# Supplementary material
Source: PubMed Central journal article supplement (PMC7284297)
Supplement: jama-323-2281-s001.pdf [file jama-323-2281-s001.pdf]

## Supplementary Online Content

Kurth T, Rist PM, Ridker PM, Kotler G, Bubes V, Buring JE. Association of migraine with aura and other risk factors with incident cardiovascular disease in women. *JAMA*. doi:10.1001/jama.2020.7172

### **Supplement.** eAppendix

This supplementary material has been provided by the authors to give readers additional information about their work.

## Supplemental Material

### eAppendix

#### Sensitivity analysis: Multiple imputations

The Monotone Propensity method for missing continuous, the Fully Conditional Specification Logistic method for missing ordinal variables, and the Discriminant Function method for missing nominal variables (SAS Institute Inc. 2018. SAS/STAT® 15.1 User's Guide. Cary, NC: SAS Institute Inc. Chapters 79, 80. The MI and MIANALIZE Procedures) were applied to evaluate whether handling of missing information had an influence on our results. The imputation was sufficient: the Relative Efficiency  $\geq 0.99$ . The results of 25 multiple imputation runs are summarized in **eTable 2**. The results are similar to the results of the main analyses in which we used a missing variable indicator to account for missing information.

**eTable 1.** Crude and adjusted\* incidence rates per 1000 person-years of major cardiovascular disease according to vascular risk factors in the Women’s Health Study (N=27,858).

| Vascular risk factor                                       | N      | N Events | Person Years | Crude Rate | Adjusted* Rate (95% CI) | P value** |
|------------------------------------------------------------|--------|----------|--------------|------------|-------------------------|-----------|
| Migraine with aura                                         | 1435   | 110      | 29,956       | 3.67       | 3.36 (2.72-3.99)        | <.001     |
| No migraine with aura***                                   | 26,423 | 1556     | 550,656      | 2.83       | 2.11 (1.98-2.24)        |           |
| Diabetes                                                   | 682    | 134      | 11,387       | 11.77      | 5.76 (4.68-6.84)        | <.001     |
| No diabetes                                                | 27176  | 1532     | 569,225      | 2.69       | 2.11 (1.98-2.24)        |           |
| Current smoking                                            | 3241   | 313      | 60,511       | 5.17       | 4.29 (3.79-4.79)        | <.001     |
| Not currently smoking                                      | 24,617 | 1353     | 520,101      | 2.60       | 1.97 (1.85-2.10)        |           |
| Systolic blood pressure ≥160 mmHg                          | 318    | 58       | 5,636        | 10.29      | 3.78 (2.76-4.81)        | .002      |
| Systolic blood pressure <160 mmHg                          | 27,540 | 1608     | 574,976      | 2.80       | 2.15 (2.02-2.28)        |           |
| Total cholesterol ≥280 mg/dL                               | 1645   | 163      | 33,094       | 4.93       | 2.85 (2.38-3.32)        | .002      |
| Total cholesterol <280 mg/dL                               | 26,213 | 1503     | 547,518      | 2.75       | 2.12 (1.99-2.25)        |           |
| HDL-C <40 mg/dL                                            | 4822   | 413      | 95,299       | 4.33       | 2.63 (2.33-2.94)        | <.001     |
| HDL-C ≥40 mg/dL                                            | 23,036 | 1253     | 485,313      | 2.58       | 2.07 (1.94-2.21)        |           |
| Triglycerides ≥194 mg/dL                                   | 5546   | 517      | 110,583      | 4.68       | 2.67 (2.38-2.95)        | <.001     |
| Triglycerides <194 mg/dL                                   | 22,312 | 1149     | 470,029      | 2.45       | 2.05 (1.92-2.19)        |           |
| Family history of myocardial infarction prior to age 60    | 3945   | 267      | 82,544       | 3.24       | 2.71 (2.38-3.05)        | <.001     |
| No family history of myocardial infarction prior to age 60 | 23,913 | 1399     | 498,068      | 2.81       | 2.08 (1.95-2.22)        |           |
| Body mass index ≥30 kg/m <sup>2</sup>                      | 4939   | 360      | 100,284      | 3.59       | 2.29 (2.02-2.56)        | .29       |
| Body mass index <30 kg/m <sup>2</sup>                      | 22,919 | 1306     | 480,328      | 2.72       | 2.13 (2.00-2.27)        |           |

CI = confidence interval; HDL-C = high-density lipoprotein cholesterol.

\* Adjusted for all vascular risk factors shown in the table, plus age, alcohol use, exercise, hypertensive treatment, ever hormone use, and pre-menopausal status.

\*\* P value shows contrast of the dichotomized vascular risk factors categories.

\*\*\* Includes women reporting migraine without aura and women not reporting migraine in the year prior to baseline.

**eTable 2.** Crude and adjusted\* incidence rates per 1000 person-years for total stroke according to vascular risk factors in the Women’s Health Study (N=27,858).

| Vascular risk factor                                       | N      | N Events | Person Years | Crude Rate | Adjusted* Rate (95% CI) | P value** |
|------------------------------------------------------------|--------|----------|--------------|------------|-------------------------|-----------|
| Migraine with aura                                         | 1435   | 57       | 30,329       | 1.88       | 1.78 (1.31-2.24)        | .01       |
| No migraine with aura***                                   | 26,423 | 830      | 555,289      | 1.50       | 1.17 (1.07-1.26)        |           |
| Diabetes                                                   | 682    | 55       | 11,934       | 4.61       | 2.50 (1.79-3.21)        | <.001     |
| No diabetes                                                | 27,176 | 832      | 573,684      | 1.45       | 1.17 (1.07-1.26)        |           |
| Current smoking                                            | 3241   | 138      | 61,724       | 2.24       | 1.92 (1.58-2.25)        | <.001     |
| Not currently smoking                                      | 24,617 | 749      | 523,894      | 1.43       | 1.12 (1.02-1.21)        |           |
| Systolic blood pressure ≥160 mmHg                          | 318    | 28       | 5,796        | 4.83       | 1.94 (1.19-2.69)        | .047      |
| Systolic blood pressure <160 mmHg                          | 27,540 | 859      | 579,822      | 1.48       | 1.18 (1.09-1.28)        |           |
| Total cholesterol ≥280 mg/dL                               | 1645   | 81       | 33,650       | 2.41       | 1.53 (1.17-1.88)        | .051      |
| Total cholesterol <280 mg/dL                               | 26,213 | 806      | 551,968      | 1.46       | 1.17 (1.08-1.27)        |           |
| HDL-C <40 mg/dL                                            | 4822   | 193      | 97,013       | 1.99       | 1.37 (1.14-1.59)        | .08       |
| HDL-C ≥40 mg/dL                                            | 23,036 | 694      | 488,605      | 1.42       | 1.16 (1.06-1.26)        |           |
| Triglycerides ≥194 mg/dL                                   | 5546   | 239      | 112,615      | 2.12       | 1.30 (1.10-1.49)        | .21       |
| Triglycerides <194 mg/dL                                   | 22,312 | 648      | 473,003      | 1.37       | 1.17 (1.06-1.27)        |           |
| Family history of myocardial infarction prior to age 60    | 3945   | 136      | 83,507       | 1.63       | 1.42 (1.18-1.67)        | .04       |
| No family history of myocardial infarction prior to age 60 | 23,913 | 751      | 502,111      | 1.50       | 1.16 (1.06-1.26)        |           |
| Body mass index ≥30 kg/m <sup>2</sup>                      | 4939   | 178      | 101,445      | 1.76       | 1.24 (1.04-1.44)        | .59       |
| Body mass index <30 kg/m <sup>2</sup>                      | 22,919 | 709      | 484,173      | 1.46       | 1.18 (1.08-1.28)        |           |

CI = confidence interval; HDL-C = high-density lipoprotein cholesterol.

\* Adjusted for all vascular risk factors shown in the table, plus age, alcohol use, exercise, hypertensive treatment, ever hormone use, and pre-menopausal status.

\*\* P value shows contrast of the dichotomized vascular risk factors categories.

\*\*\* Includes women reporting migraine without aura and those not reporting migraine in the year prior to baseline.

**eTable 3.** Crude and adjusted\* incidence rates per 1000 person-years for myocardial infarction according to vascular risk factors in the Women’s Health Study (N=27,858).

| Vascular risk factor                                       | N      | N Events | Person Years | Crude Rate | Adjusted* Rate (95% CI) | P value** |
|------------------------------------------------------------|--------|----------|--------------|------------|-------------------------|-----------|
| Migraine with aura                                         | 1435   | 43       | 30,387       | 1.42       | 1.21 (0.84-1.58)        | .02       |
| No migraine with aura                                      | 26,423 | 586      | 555,777      | 1.05       | 0.77 (0.69-0.85)        |           |
| Diabetes                                                   | 682    | 65       | 11,674       | 5.57       | 2.58 (1.86-3.29)        | <.001     |
| No diabetes                                                | 27176  | 564      | 574,489      | 0.98       | 0.77 (0.69-0.84)        |           |
| Current smoking                                            | 3241   | 150      | 61,325       | 2.45       | 1.92 (1.58-2.25)        | <.001     |
| Not currently smoking                                      | 24,617 | 479      | 524,838      | 0.91       | 0.70 (0.63-0.78)        |           |
| Systolic blood pressure ≥160 mmHg                          | 318    | 20       | 5,787        | 3.46       | 1.23 (0.66-1.79)        | .12       |
| Systolic blood pressure <160 mmHg                          | 27,540 | 609      | 580377       | 1.05       | 0.79 (0.71-0.86)        |           |
| Total cholesterol ≥280 mg/dL                               | 1645   | 68       | 33,563       | 2.03       | 1.10 (0.81-1.38)        | .02       |
| Total cholesterol <280 mg/dL                               | 26,213 | 561      | 552,601      | 1.02       | 0.77 (0.70-0.85)        |           |
| HDL-C <40 mg/dL                                            | 4822   | 191      | 96,484       | 1.98       | 1.10 (0.90-1.30)        | <.001     |
| HDL-C ≥40 mg/dL                                            | 23,036 | 438      | 489,680      | 0.89       | 0.74 (0.66-0.82)        |           |
| Triglycerides ≥194 mg/dL                                   | 5546   | 233      | 112,134      | 2.08       | 1.14 (0.95-1.33)        | <.001     |
| Triglycerides <194 mg/dL                                   | 22,312 | 396      | 474,030      | 0.84       | 0.72 (0.64-0.80)        |           |
| Family history of myocardial infarction prior to age 60    | 3945   | 114      | 83,403       | 1.37       | 1.08 (0.88-1.29)        | .002      |
| No family history of myocardial infarction prior to age 60 | 23,913 | 515      | 502,761      | 1.02       | 0.75 (0.67-0.83)        |           |
| Body mass index ≥30 kg/m <sup>2</sup>                      | 4939   | 135      | 101,398      | 1.33       | 0.73 (0.58-0.87)        | .33       |
| Body mass index <30 kg/m <sup>2</sup>                      | 22,919 | 494      | 484,766      | 1.02       | 0.80 (0.72-0.89)        |           |

CI = confidence interval; HDL-C = high-density lipoprotein cholesterol.

\* Adjusted for all vascular risk factors shown in the table, plus age, alcohol use, exercise, hypertensive treatment, ever hormone use, and pre-menopausal status.

\*\* P value shows contrast of the dichotomized vascular risk factors categories. \*\*\* Includes women reporting migraine without aura and those not reporting migraine in the year prior to baseline.

**eTable 4.** Crude and adjusted\* incidence rates per 1000 person-years for death due to cardiovascular disease according to vascular risk factors in the Women’s Health Study (N=27,858).

| Vascular risk factor                                       | N      | N Events | Person Years | Crude Rate | Adjusted* Rate (95% CI) | P value** |
|------------------------------------------------------------|--------|----------|--------------|------------|-------------------------|-----------|
| Migraine with aura                                         | 1435   | 22       | 32,695       | 0.67       | 0.46 (0.26-0.65)        | .07       |
| No migraine with aura***                                   | 26,423 | 369      | 596,658      | 0.62       | 0.28 (0.23-0.33)        |           |
| Diabetes                                                   | 682    | 40       | 13,431       | 2.98       | 0.85 (0.54-1.16)        | <.001     |
| No diabetes                                                | 27176  | 351      | 615,922      | 0.57       | 0.28 (0.23-0.33)        |           |
| Current smoking                                            | 3241   | 77       | 68,457       | 1.13       | 0.69 (0.52-0.87)        | <.001     |
| Not currently smoking                                      | 24,617 | 314      | 560,896      | 0.56       | 0.25 (0.21-0.30)        |           |
| Systolic blood pressure ≥160 mmHg                          | 318    | 20       | 6,542        | 3.06       | 0.54 (0.28-0.79)        | .048      |
| Systolic blood pressure <160 mmHg                          | 27,540 | 371      | 622,811      | 0.60       | 0.28 (0.24-0.33)        |           |
| Total cholesterol ≥280 mg/dL                               | 1645   | 40       | 36,762       | 1.09       | 0.36 (0.23-0.49)        | .21       |
| Total cholesterol <280 mg/dL                               | 26,213 | 351      | 592,591      | 0.59       | 0.28 (0.23-0.33)        |           |
| HDL-C <40 mg/dL                                            | 4822   | 93       | 106,409      | 0.87       | 0.31 (0.22-0.39)        | .57       |
| HDL-C ≥40 mg/dL                                            | 23,036 | 298      | 522,944      | 0.57       | 0.28 (0.23-0.33)        |           |
| Triglycerides ≥194 mg/dL                                   | 5546   | 124      | 123,244      | 1.01       | 0.34 (0.26-0.42)        | .09       |
| Triglycerides <194 mg/dL                                   | 22,312 | 267      | 506,109      | 0.53       | 0.27 (0.23-0.32)        |           |
| Family history of myocardial infarction prior to age 60    | 3945   | 54       | 89,926       | 0.60       | 0.35 (0.25-0.46)        | .13       |
| No family history of myocardial infarction prior to age 60 | 23,913 | 337      | 539,427      | 0.63       | 0.28 (0.23-0.32)        |           |
| Body mass index ≥30 kg/m <sup>2</sup>                      | 4939   | 96       | 110,248      | 0.87       | 0.38 (0.28-0.48)        | .02       |
| Body mass index <30 kg/m <sup>2</sup>                      | 22,919 | 295      | 519,105      | 0.57       | 0.27 (0.22-0.32)        |           |

CI = confidence interval; HDL-C = high-density lipoprotein cholesterol.

\* Adjusted for all vascular risk factors shown in the table, plus age, alcohol use, exercise, hypertensive treatment, ever hormone use, and pre-menopausal status.

\*\* P value shows contrast of the dichotomized vascular risk factors categories. \*\*\* Includes women reporting migraine without aura and those not reporting migraine in the year prior to baseline.

**eTable 5.** Adjusted\* incidence rate per 1000 person-years for major cardiovascular disease according to vascular risk factors in the Women’s Health Study (N=27,858) using 25 multiple imputations runs to account for missing information.

| <b>Vascular risk factor</b>                             | <b>Mean (95% CI)</b> | <b>Minimum</b> | <b>Maximum</b> | <b>CV</b> |
|---------------------------------------------------------|----------------------|----------------|----------------|-----------|
| Migraine with aura                                      | 3.360 (3.359-3.361)  | 3.334          | 3.366          | 0.086     |
| Diabetes                                                | 5.749 (5.745-5.753)  | 5.728          | 5.761          | 0.162     |
| Current smoking                                         | 4.304 (4.300-4.308)  | 4.291          | 4.322          | 0.232     |
| Systolic blood pressure $\geq$ 160 mmHg                 | 3.765 (3.752-3.778)  | 3.718          | 3.836          | 0.831     |
| Total cholesterol $\geq$ 280 mg/dL                      | 2.848 (2.847-2.850)  | 2.842          | 2.854          | 0.112     |
| HDL-C <40 mg/dL                                         | 2.636 (2.635-2.637)  | 2.630          | 2.639          | 0.092     |
| Triglycerides $\geq$ 194 mg/dL                          | 2.670 (2.669-2.671)  | 2.668          | 2.674          | 0.067     |
| Family history of myocardial infarction prior to age 60 | 2.705 (2.696-2.714)  | 2.670          | 2.749          | 0.829     |
| Body mass index $\geq$ 30 kg/m <sup>2</sup>             | 2.291 (2.289-2.293)  | 2.285          | 2.301          | 0.198     |

CV = coefficient of variation.

\* Adjusted for all vascular risk factors (dichotomous) shown in the table, plus age, alcohol use, exercise, hypertensive treatment, ever hormone use, and pre-menopausal status.

**eTable 6.** Adjusted\* incidence rates per 1000 person-years for major cardiovascular disease according to vascular risk factors in the Women’s Health Study (N=27,858), using different reference groups.

| Vascular risk factor                                    | Reference group includes migraine without aura, those with no history of migraine, and those never reported migraine (N=27,858) |           | Reference group includes only women who never reported migraine (N=24,163) |           |
|---------------------------------------------------------|---------------------------------------------------------------------------------------------------------------------------------|-----------|----------------------------------------------------------------------------|-----------|
|                                                         | Adjusted* Rate (95% CI)                                                                                                         | P value** | Adjusted* Rate (95% CI)                                                    | P value** |
| Migraine with aura                                      | 3.36 (2.72-3.99)                                                                                                                | -         | 3.38 (2.74-4.02)                                                           | --        |
| Diabetes                                                | 5.76 (4.68-6.84)                                                                                                                | <.001     | 5.68 (4.55-6.82)                                                           | <.001     |
| Current smoking                                         | 4.29 (3.79-4.79)                                                                                                                | .02       | 4.23 (3.70-4.77)                                                           | .04       |
| Systolic blood pressure ≥160 mmHg                       | 3.78 (2.76-4.81)                                                                                                                | .48       | 3.73 (2.64-4.82)                                                           | .58       |
| Total cholesterol ≥280 mg/dL                            | 2.85 (2.38-3.32)                                                                                                                | .19       | 3.04 (2.51-3.56)                                                           | .40       |
| HDL-C <40 mg/dL                                         | 2.63 (2.33-2.94)                                                                                                                | .04       | 2.52 (2.20-2.84)                                                           | .01       |
| Triglycerides ≥194 mg/dL                                | 2.67 (2.38-2.95)                                                                                                                | .043      | 2.70 (2.39-3.00)                                                           | .048      |
| Family history of myocardial infarction prior to age 60 | 2.71 (2.38-3.05)                                                                                                                | .07       | 2.62 (2.26-2.97)                                                           | .03       |
| Body mass index ≥30 kg/m <sup>2</sup>                   | 2.29 (2.02-2.56)                                                                                                                | .001      | 2.34 (2.04-2.63)                                                           | .002      |

\* Adjusted for all vascular risk factors (dichotomous) listed in the table, plus age, alcohol use, exercise, hypertensive treatment, ever hormone use, and pre-menopausal status.

\*\* P value from a t-test examines whether the adjusted incidence rate among those with migraine with aura differs statistically from the adjusted incidence rate of the other vascular risk factor.



**Adjusted Incidence Rate for Total Stroke per 1000 Person-Years**

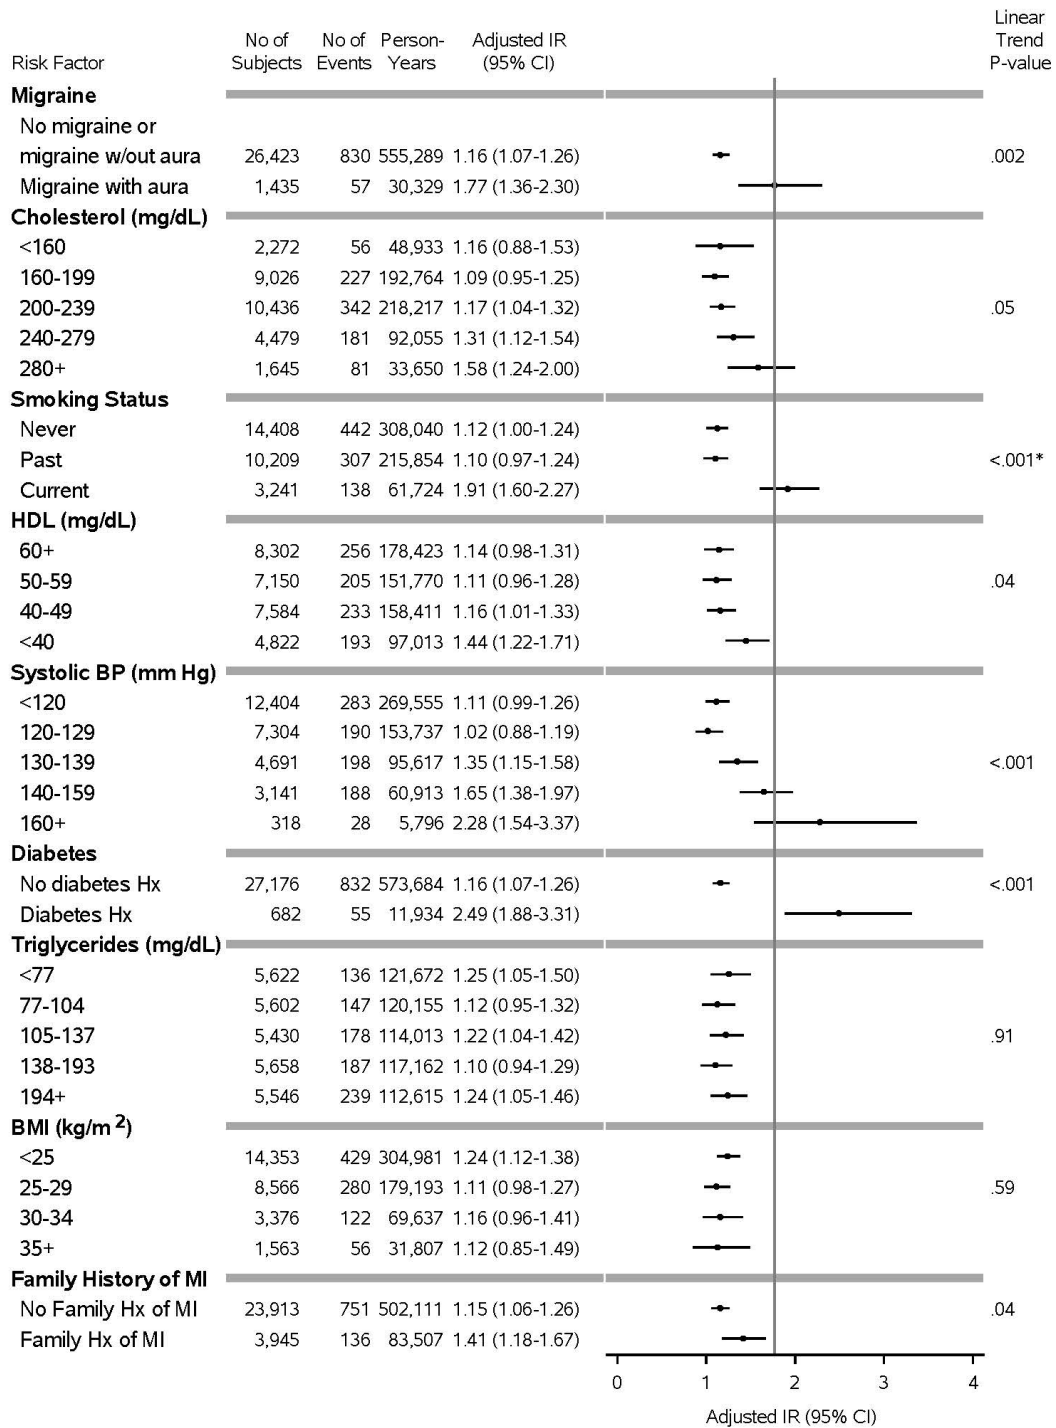

**eFigure 1.** The vertical line indicates the adjusted incidence rate for migraine with aura. Values to the left of the vertical line indicate lower and values to the right higher adjusted incident rates of total stroke compared to the incidence rate of migraine with aura. IR = incidence rate; CI = confidence interval; HDL-C = high-density lipoprotein cholesterol; BP = blood pressure; MI= myocardial infarction. Adjusted all vascular risk factors shown in the figure and age, alcohol use, exercise, hypertensive treatment, ever hormone use, and pre-menopausal status. Because two different approaches were used for categorizing covariates in the multivariable models, the estimated adjusted incidence rates differ slightly in eFigure 1 (in which some covariates were categorized as polychotomous) and Table 2 (in which all covariates were categorized as dichotomous). P values for trend across risk marker categories.  
\*P value was calculated using a chi-square test.

**Adjusted Incidence Rate for Myocardial Infarction per 1000 Person-Years**

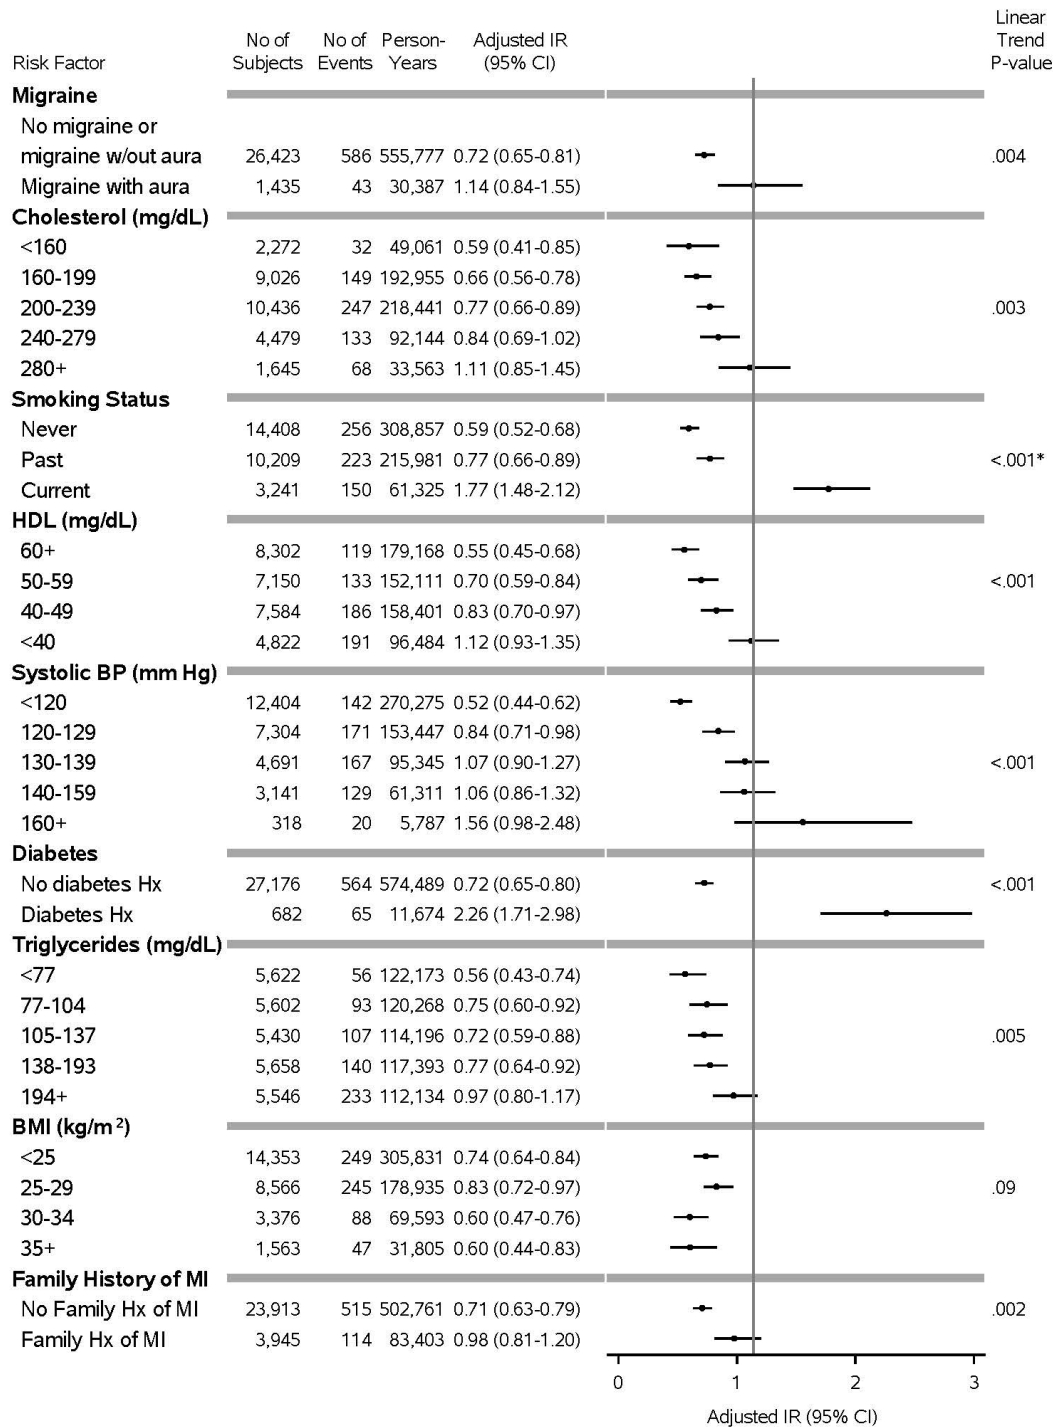

**eFigure 2.** The vertical line indicates the adjusted incidence rate for migraine with aura. Values to the left of the vertical line indicate lower and values to the right higher adjusted incident rates of myocardial infarction compared to the incidence rate of migraine with aura. IR = incidence rate; CI = confidence interval; HDL-C = high-density lipoprotein cholesterol; BP = blood pressure; MI= myocardial infarction. Adjusted for all vascular risk factors shown in the figure and age, alcohol use, exercise, hypertensive treatment, ever hormone use, and pre-menopausal status. Because two different approaches were used for categorizing covariates in the multivariable models, the estimated adjusted incidence rates differ slightly in eFigure 2 (in which some covariates were categorized as polychotomous) and Table 2 (in which all covariates were categorized as dichotomous). P values for trend across risk marker categories. \*P value was calculated using a chi-square test.

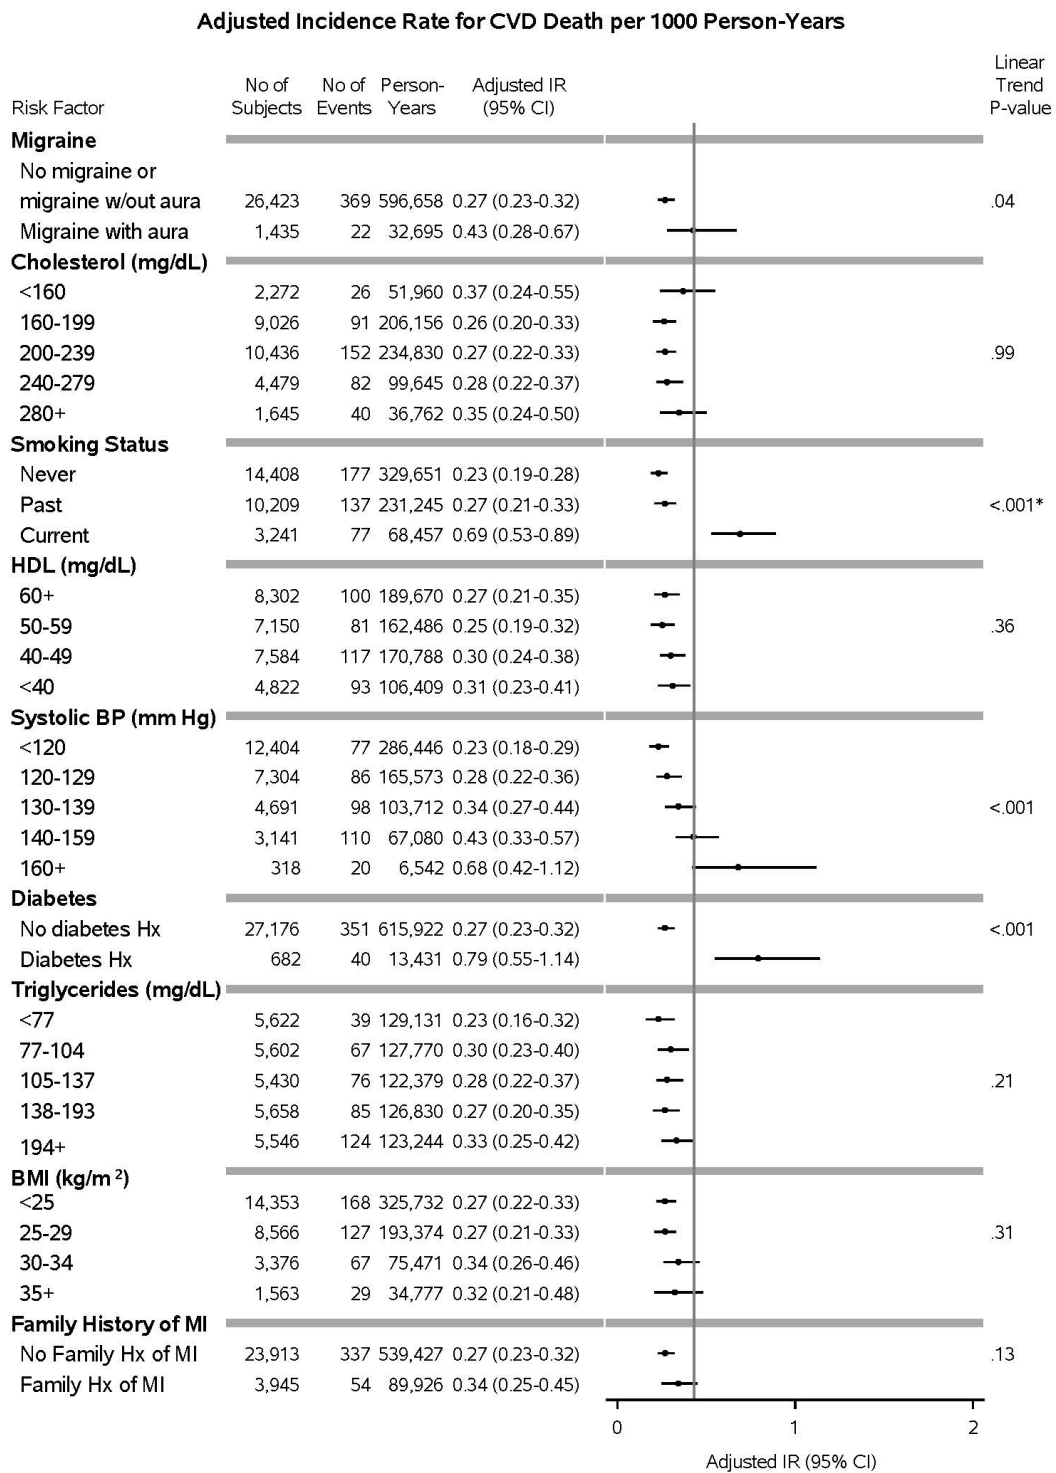

**eFigure 3.** The vertical line indicates the adjusted incidence rate for migraine with aura. Values to the left of the vertical line indicate lower and values to the right higher adjusted incident rates of CVD death compared to the incidence rate of migraine with aura. CVD = cardiovascular disease; IR = incidence rate; CI = confidence interval; HDL-C = high-density lipoprotein cholesterol; BP = blood pressure; MI= myocardial infarction. Adjusted for all vascular risk factors shown in the figure and age, alcohol use, exercise, hypertensive treatment, ever hormone use, and pre-menopausal status. Because two different approaches were used for categorizing covariates in the multivariable models, the estimated adjusted incidence rates differ slightly in eFigure 3 (in which some covariates were categorized as polychotomous) and Table 2 (in which all covariates were categorized as dichotomous). P values for trend across risk marker categories.

\*P value was calculated using a chi-square test.
